# Supplementary material
Source: PubMed Central journal article supplement (PMC2657342)

## Supporting Information Figure Legends

**Supporting Figure 1.** Starting solutions of pre-treated D187N gelsolin173-243 peptides were analyzed by atomic force microscopy (AFM) and analytical ultracentrifugation (AUC) to confirm the presence of ~93% monomeric peptides.

**Supporting Figure 2. (A, B, C)** Reactions were performed with WT gelsolin173-243 (10  $\mu$ M) (A) in 100 mM NaCl, 50 mM HEPES (pH 7) buffer with 20  $\mu$ M thioflavin T added at 37 °C shaking every 10 mins for 5 seconds per reading. Data shown is an average of triplicate samples, corrected for background fluorescence. GAGs (5  $\mu$ M) indicated were added at the initiation of aggregation. **(D)** Reactions were performed with D187Y gelsolin173-243 (10  $\mu$ M) in 100 mM NaCl, 50 mM HEPES (pH 7) or sodium acetate (pH 5) buffer with 20  $\mu$ M thioflavin T added at 37 °C shaking every 10 mins for 5 seconds per reading as described above.

**Supporting Figure 3.** Reactions were performed with D187N gelsolin173-243 (5  $\mu$ M) in 100 mM NaCl, 50 mM HEPES (pH 7) buffer with 20  $\mu$ M thioflavin T added at 37 °C shaking every 10 mins for 5 seconds per reading. Data shown is an average of triplicate samples, corrected for background fluorescence. Heparin, dextran sulfate, dextran, poly-glutamic acid (poly E) or poly-L-lysine (poly K) (5  $\mu$ M) were added at the initiation of aggregation.

1    **Supporting Figure 4.** Original TEM images taken. **(A)** D187N gelsolin173-243  
2    aggregated in the presence of dp4 heparin oligo and **(B)** with 17-19 kDa heparin.

3

4    **Supporting Figure 5.** Original TEM images taken. D187N gelsolin173-243 aggregated  
5    alone at 43 h **(A)** and at 90 h **(B)**. **(C)** D187N gelsolin173-243 aggregated with heparin  
6    from the start; image taken at 43 h. **(D)** Aggregated sample at 90 h after heparin is  
7    introduced at 43 h.

8

9    **Supporting Figure 6.** Light scattering data points overlaid with analytical size exclusion  
10   chromatography UV absorption traces (280 nm) of D187N gelsolin 173-243 aggregation  
11   samples at 12 h **(A)**, with HS **(B)** and with heparin **(C)**. The monomer peak and the  
12   soluble aggregate peak (molar mass derived from light-scattering) are depicted.

Supporting Figure 1.

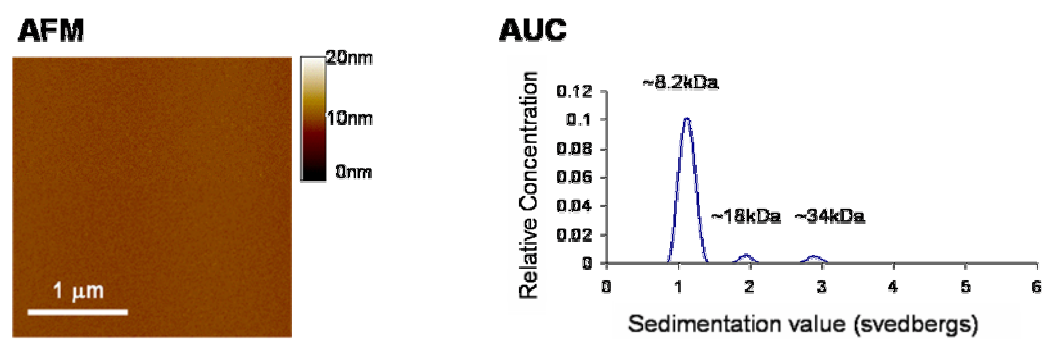

Supporting Figure 2.

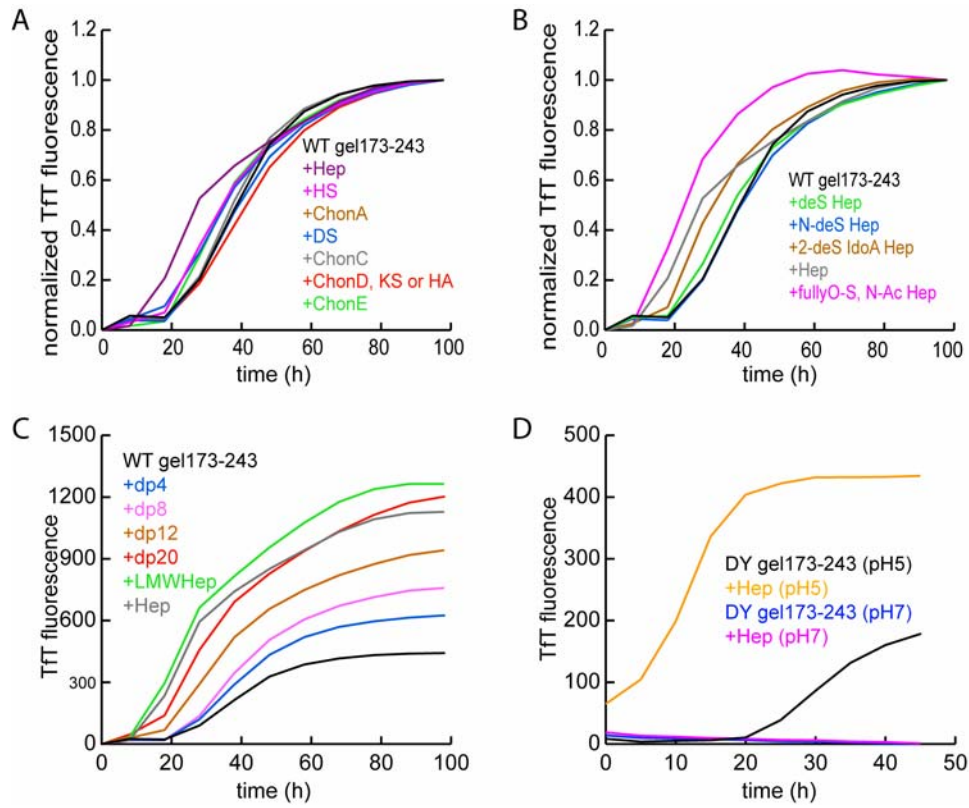

Supporting Figure 3.

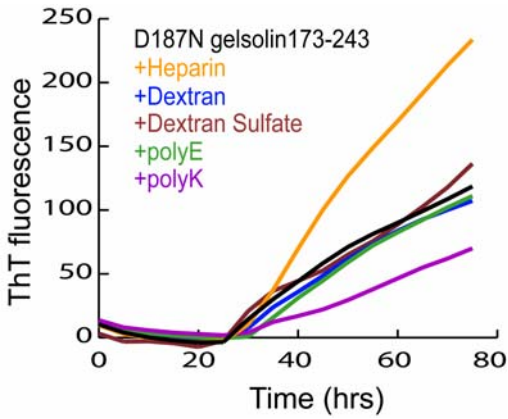

Supporting Figure 4.

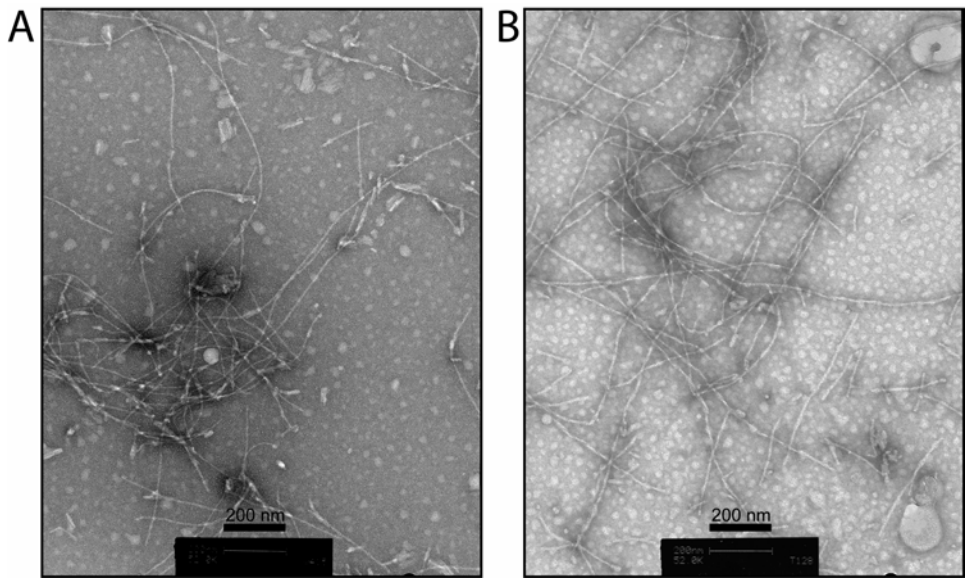

**Supporting Figure 5.**

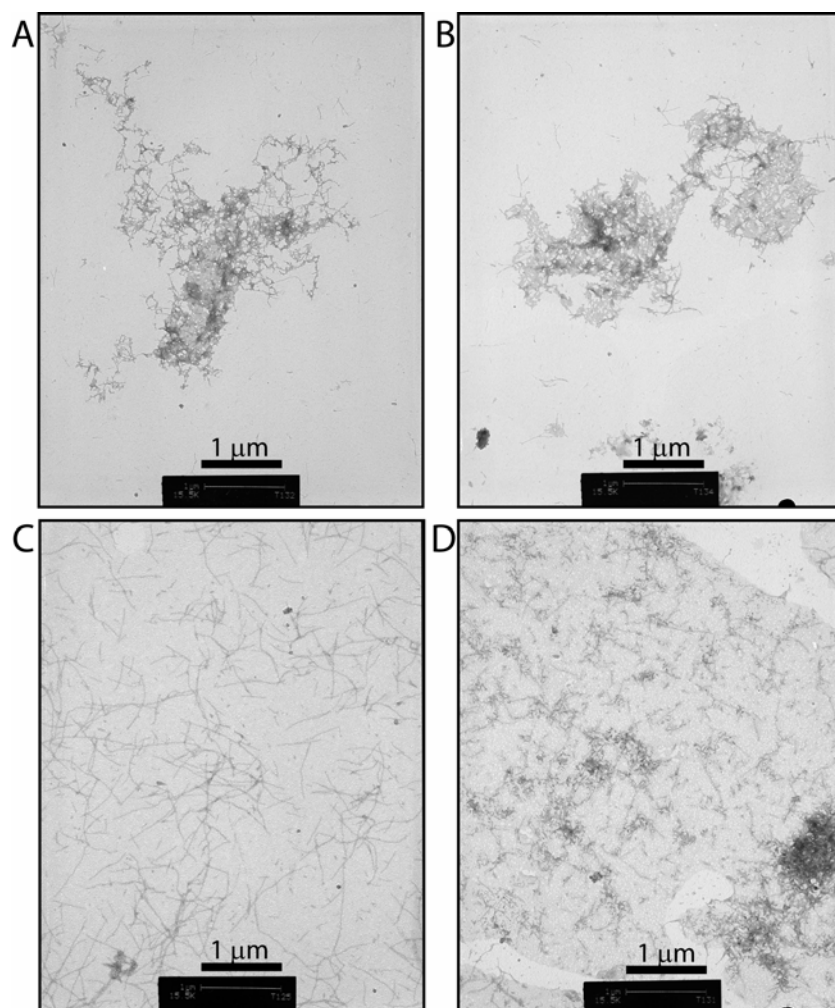

**Supporting Figure 6.**

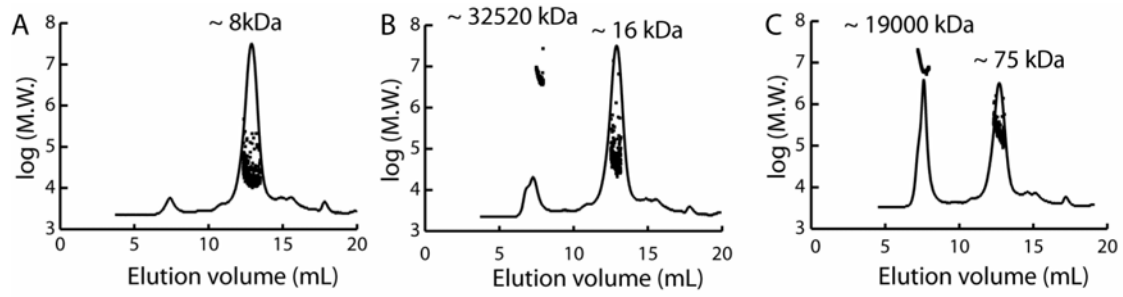

Supplement: NIHMS60910-supplement-si20051215_044.pdf [file NIHMS60910-supplement-si20051215_044.pdf]
